# Supplementary material for: Effect of Gaseous Citral on Table Grapes Contaminated by Rhizopus oryzae ITEM 18876
Source: MDPI journal article supplement (doi:10.3390/foods11162478), 2022-08-17
Supplement: s1 [file s1]

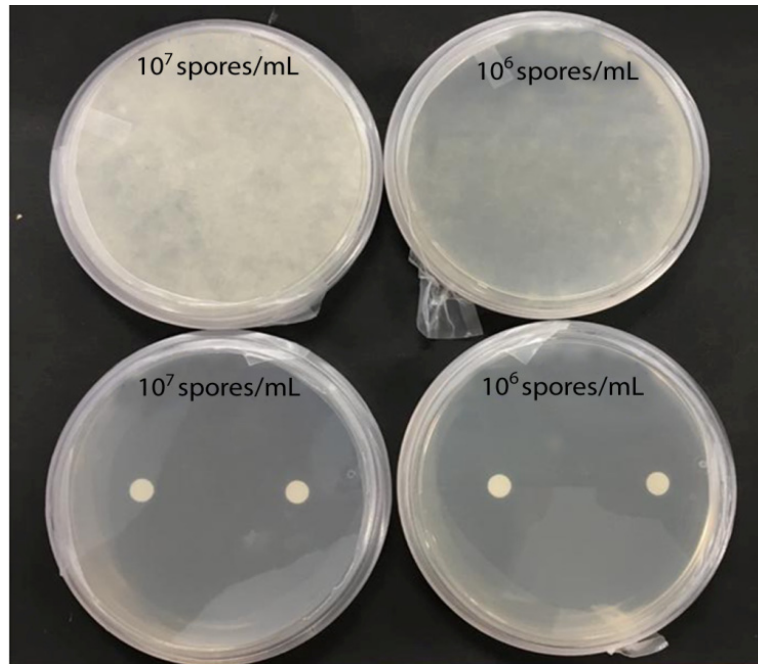

Figure S1. Disk diffusion method displaying antimicrobial activity of citral (0.5  $\mu$ L) against *R. oryzae* ITEM 18876 inoculated at  $10^7$  and  $10^6$  spores/mL respectively on PDA and incubated for 7 days at 25 °C of incubation.
